# Supplementary material
Source: Springer Nature journal article supplement (https://www.springermedizin.de/resource/supplementary/12889_2009_1807_MOESM1_ESM.pdf/9504074)

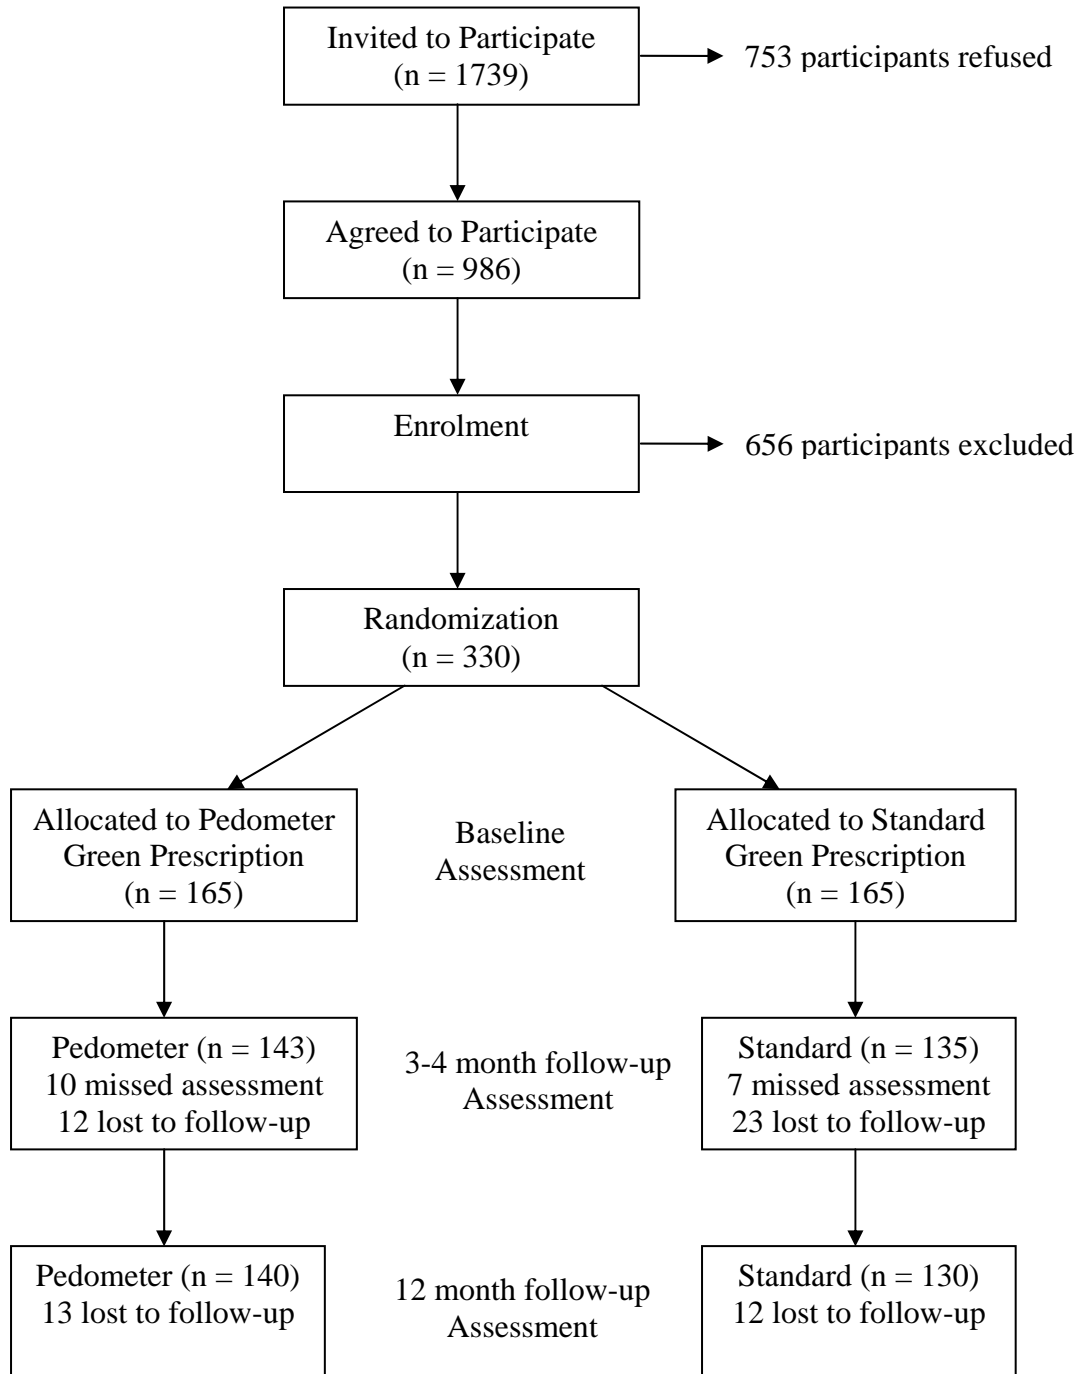

Supplement: MOESM1 [file 9504074]
